# Supplementary material
Source: PubMed Central journal article supplement (PMC3151080)
Supplement: supp_M111.234799_Highly.pdf [file supp_M111.234799_Highly.pdf]

## Supplemental Materials

Table S1. Anti-HIV activities of the chimeric inhibitors in R5 cell-cell fusion assay

| Inhibitor                | 5P12            | 5P12+C3<br>7     | 5P12-lin<br>ker-C37 | C37       | 5P14            | 5P14+C3<br>7   | 5P14-lin<br>ker-C37 |
|--------------------------|-----------------|------------------|---------------------|-----------|-----------------|----------------|---------------------|
| IC <sub>50</sub><br>(nM) | 0.051 ±<br>0.01 | 0.044 ±<br>0.005 | 0.009 ±<br>0.003    | 9.1 ± 4.1 | 0.03 ±<br>0.002 | 0.03 ±<br>0.01 | 0.006 ±<br>0.001    |

Results are average IC<sub>50</sub> ± SD (nM) from 4 or more independent experiments in triplicate.  
R5 fusion stands for P5L (R5) cells fusion with Hela-ADA cells.

Table S2. Anti-HIV activities of the chimeric inhibitors in X4 cell-cell fusion assay

| IC <sub>50</sub> (nM) | C37       | 5P12-linke<br>r-C37 | 5P12 +<br>C37 | 5P14-linke<br>r-C37 | 5P14 +<br>C37 |
|-----------------------|-----------|---------------------|---------------|---------------------|---------------|
| Magi-X4 (X4)          | 1.5 ± 0.3 | 4.7 ± 0.9           | 2.2 ± 0.2     | 4.3 ± 0.5           | 2.4 ± 0.7     |
| TZM-bl<br>(R5/X4)     | 2.1 ± 0.8 | 0.006 ±<br>0.003    | 2.1 ± 0.2     | 0.005 ±<br>0.002    | 2.6 ± 1.0     |

Results are average IC<sub>50</sub> ± SD (nM) from 4 or more independent experiments in triplicate.  
X4 fusion stands for Magi-X4 cells fusion with HL2/3 cells.  
R5/X4 fusion stands for TZM (R5/X4) cells fusion with HL2/3 cells.

Table S3. Anti-HIV activities of 5P12 + C37 and 5P14+ C37 in single-cycle viral assay

| HIV virus      | Tropism | 5P12+C37    | 5P14+C37     |
|----------------|---------|-------------|--------------|
| BaL            | R5      | 0.30 ± 0.05 | 0.16 ± 0.03  |
| SF162          | R5      | 0.61 ± 0.11 | 0.13 ± 0.08  |
| ADA            | R5      | 0.54 ± 0.06 | 0.13 ± 0.009 |
| JRFL           | R5      | 0.56 ± 0.05 | 0.19 ± 0.09  |
| US005          | R5      | 0.28 ± 0.08 | 0.10 ± 0.01  |
| 6535           | R5      | 0.7 ± 0.2   | 0.08 ± 0.008 |
| HXB2 (Magi-X4) | X4      | 9.6 ± 1.3   | 8.5 ± 1.5    |
| HXB2 (TZM)     | X4      | 3.6 ± 0.1   | 4.6 ± 0.3    |
| VSV-G          | > 500   | > 500       | > 500        |

Results are average IC<sub>50</sub> ± SD (nM) from 4 or more independent experiments in triplicate.

Table S4. Anti-HIV activities of 5P12-linker-C37 mutations in cell-cell fusion assay

| Tropism      | 5P12-linker<br>-C37 | Mutation in<br>RANTES        | Mutation in C37          |                          | Change of linker length |                                    |
|--------------|---------------------|------------------------------|--------------------------|--------------------------|-------------------------|------------------------------------|
|              |                     | P2-RANTE<br>S-linker-C3<br>7 | 5P12-linker<br>-C37I642D | 5P12-linker<br>-C37I656D | 5P12-GGS-<br>C37        | 5P12-(GG<br>GGG) <sub>4</sub> -C37 |
| R5           | 0.009 ±<br>0.003    | 1.2 ± 0.09                   | 0.06 ±<br>0.005          | 0.07 ±<br>0.003          | 0.03 ± 0.01             | 0.01 ±<br>0.002                    |
| X4 (Magi-X4) | 4.7 ± 0.9           | 3.9 ± 0.5                    | > 500                    | 59.4 ± 15.4              | 4.1 ± 0.9               | 6.1 ± 1.7                          |
| X4 (TZM-bl)  | 0.006 ±<br>0.003    | 0.2 ± 0.09                   | > 500                    | 0.05 ± 0.01              | 0.008 ±<br>0.003        | 0.003 ±<br>0.001                   |

Results are average IC<sub>50</sub> ± SD (nM) from 4 or more independent experiments in triplicate.

Figure S1. The correlation between the viral sensitivity to C37 and the magnitude of the relative potency enhancement of the chimeric inhibitors over RANTES variants alone. Numbers in parentheses are fold of relative potency enhancement.

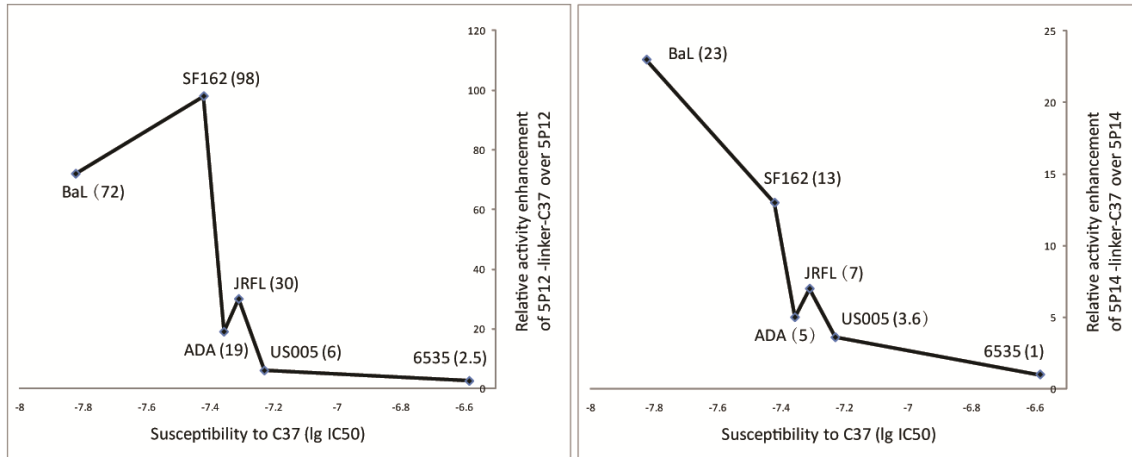

Figure S2 CCR5 receptor density comparison by flow cytometry. The CCR5 receptor expression levels on HeLa-TZM-bl cells and HeLa-P5L cells were compared using flow cytometry.

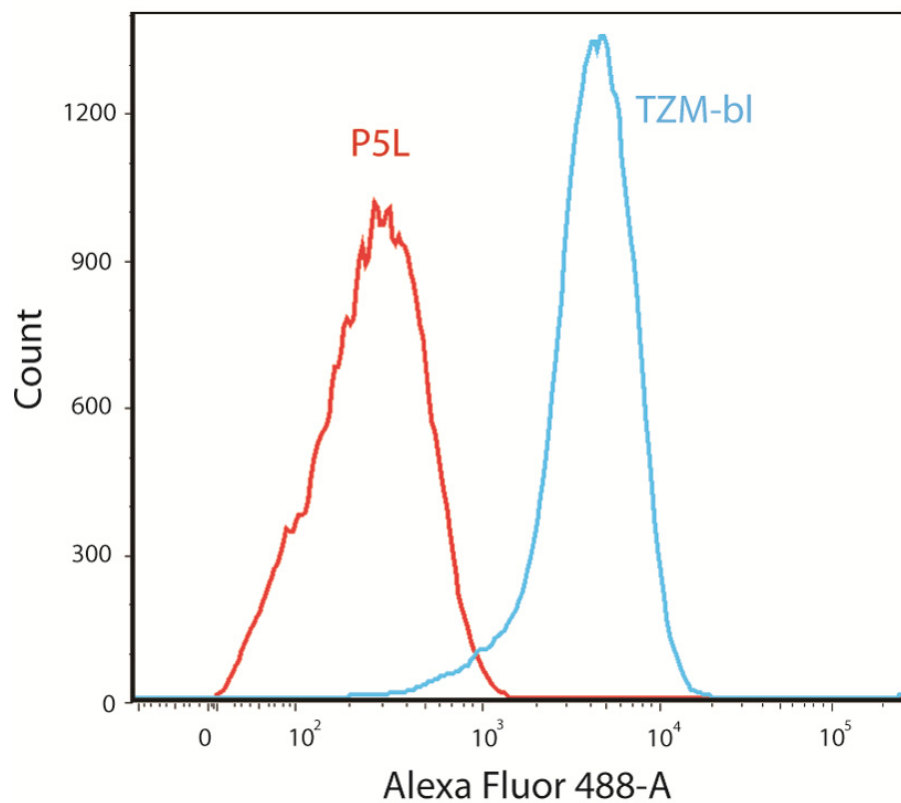

Table S5. Anti-HIV activities of the chimeric inhibitors in R5 tropic fusion assays with P5L and TZM-bl as target cells.

| Cell lines<br>CCR5 density | Hela-P5L<br>Low | TZM-bl<br>High |
|----------------------------|-----------------|----------------|
| 5P12                       | 0.051 ± 0.01    | 14 ± 1.4       |
| 5P12+C37                   | 0.044 ± 0.005   | 7.0 ± 1.3      |
| 5P12-linker-C37            | 0.009 ± 0.003   | 0.8 ± 0.2      |
| C37                        | 9.1 ± 4.1       | 340 ± 80       |
| 5P14                       | 0.03 ± 0.002    | 11 ± 2.4       |
| 5P14+C37                   | 0.03 ± 0.01     | 4.8 ± 0.2      |
| 5P14-linker-C37            | 0.006 ± 0.001   | 0.6 ± 0.02     |

Results are average  $IC_{50} \pm SD$  (nM) from 4 or more independent experiments in triplicate.
